# Supplementary material for: Global Trends and Outcomes of Research Integration in Medical Curricula: A Systematic Review
Source: Research Square preprint supplement (doi:10.21203/rs.3.rs-6432347/v1), 2025-05-13
Supplement: Supplementary file 1 [file b13c5d6658d4f2f8b5ac8274.docx]

**Supplementary Material**

1.Supplementary Material 1. PRISMA Checklist

2. Supplementary Material 2. Complete Search Strategy for All Databases

3. Supplementary Material 3. Detailed Quality Assessment Results

4. Supplementary Material 4 Additional Tables

**1. Supplementary Material 1.** PRISMA Checklist

| **Topic** | **No.** | **Item** | **The location where item is reported** |
| --- | --- | --- | --- |
| **TITLE** |  |  |  |
| **Title** | 1 | Identify the report as a systematic review. | Page1 |
| **ABSTRACT** |  |  |  |
| **Abstract** | 2 | See the PRISMA 2020 for the Abstracts checklist | Page 2 |
| **INTRODUCTION** |  |  |  |
| **Rationale** | 3 | Describe the rationale for the review in the context of existing knowledge. | Page 3 |
| **Objectives** | 4 | Provide an explicit statement of the objective(s) or question(s) the review addresses. | Page 3 |
| **METHODS** |  |  |  |
| **Eligibility criteria** | 5 | Specify the inclusion and exclusion criteria for the review and how studies were grouped for the syntheses. | Page 4 |
| **Information sources** | 6 | Specify all databases, registers, websites, organizations, reference lists, and other sources searched or consulted to identify studies. Specify the date when each source was last searched or consulted. | Page 4 |
| **Search strategy** | 7 | Present the full search strategies for all databases, registers, and websites, including any filters and limits used. | Page 5 and Supplementary 2 |
| **Selection process** | 8 | Specify the methods used to decide whether a study met the inclusion criteria of the review, including how many reviewers screened each record and each report retrieved, whether they worked independently, and if applicable, details of automation tools used in the process. | Page 4 |
| **Data collection process** | 9 | Specify the methods used to collect data from reports, including how many reviewers collected data from each report, whether they worked independently, any processes for obtaining or confirming data from study investigators, and if applicable, details of automation tools used in the process. | Page 4 |
| **Data items** | 10a | List and define all outcomes for which data were sought. Specify whether all results that were compatible with each outcome domain in each study were sought (e.g. for all measures, time points, analyses), and if not, the methods used to decide which results to collect. | Page 4 |
|  | 10b | List and define all other variables for which data were sought (e.g. participant and intervention characteristics, funding sources). Describe any assumptions made about any missing or unclear information. | Page 4 |
| **Study risk of bias assessment** | 11 | Specify the methods used to assess risk of bias in the included studies, including details of the tool(s) used, how many reviewers assessed each study and whether they worked independently, and if applicable, details of automation tools used in the process. | Page 5 |
| **Effect measures** | 12 | Specify for each outcome the effect measure(s) (e.g. risk ratio, mean difference) used in the synthesis or presentation of results. | Page 5 |
| **Synthesis methods** | 13a | Describe the processes used to decide which studies were eligible for each synthesis (e.g. tabulating the study intervention characteristics and comparing against the planned groups for each synthesis (item 5)). | Page 5 |
|  | 13b | Describe any methods required to prepare the data for presentation or synthesis, such as handling of missing summary statistics, or data conversions. | Page 5 |
| 13c | Describe any methods used to tabulate or visually display results of individual studies and syntheses. | Page 5 |
| 13d | Describe any methods used to synthesize results and provide a rationale for the choice(s). If meta-analysis was performed, describe the model(s), method(s) to identify the presence and extent of statistical heterogeneity, and software package(s) used. | Page 5 |
| 13e | Describe any methods used to explore possible causes of heterogeneity among study results (e.g. subgroup analysis, meta-regression). | Page 5 |
| 13f | Describe any sensitivity analyses conducted to assess robustness of the synthesized results. | Page 5 |
| **Reporting bias assessment** | 14 | Describe any methods used to assess risk of bias due to missing results in a synthesis (arising from reporting biases). | Page 5 |
| **Certainty assessment** | 15 | Describe any methods used to assess certainty (or confidence) in the body of evidence for an outcome. | Page 5 |
| **RESULTS** |  |  |  |
| **Study selection** | 16a | Describe the results of the search and selection process, from the number of records identified in the search to the number of studies included in the review, ideally using a flow diagram. | Page 6 and Fig.1 |
|  | 16b | Cite studies that might appear to meet the inclusion criteria, but which were excluded, and explain why they were excluded. | Fig.1 |
| **Study characteristics** | 17 | Cite each included study and present its characteristics. | Page 6-7 and Table S1 |
| **Risk of bias in studies** | 18 | Present assessments of risk of bias for each included study. | Page 8 and supplementary 3 |
| **Results of individual studies** | 19 | For all outcomes, present, for each study: (a) summary statistics for each group (where appropriate) and (b) an effect estimates and its precision (e.g., confidence/credible interval), ideally using structured tables or plots. | Page -12 |
| **Results of syntheses** | 20a | For each synthesis, briefly summarise the characteristics and risk of bias among contributing studies. | Fig. 2 |
|  | 20b | Present results of all statistical syntheses conducted. If meta-analysis was done, present for each the summary estimate and its precision (e.g. confidence/credible interval) and measures of statistical heterogeneity. If comparing groups, describe the direction of the effect. | N/A |
| 20c | Present results of all investigations of possible causes of heterogeneity among study results. | N/A |
| 20d | Present results of all sensitivity analyses conducted to assess the robustness of the synthesized results. | N/A |
| **Reporting biases** | 21 | Present assessments of risk of bias due to missing results (arising from reporting biases) for each synthesis assessed. | N/A |
| **Certainty of evidence** | 22 | Present assessments of certainty (or confidence) in the body of evidence for each outcome assessed. | N/A |
| **DISCUSSION** |  |  |  |
| **Discussion** | 23a | Provide a general interpretation of the results in the context of other evidence. | Page 15 |
|  | 23b | Discuss any limitations of the evidence included in the review. | Page 15 |
| 23c | Discuss any limitations of the review processes used. | Page 15 |
| 23d | Discuss the implications of the results for practice, policy, and future research. | Page 16 |
| **OTHER INFORMATION** |  |  |  |
| **Registration and protocol** | 24a | Provide registration information for the review, including the register name and registration number, or state that the review was not registered. | N/A |
|  | 24b | Indicate where the review protocol can be accessed, or state that a protocol was not prepared. | N/A |
| 24c | Describe and explain any amendments to information provided at registration or in the protocol. | N/A |
| **Support** | 25 | Describe sources of financial or non-financial support for the review, and the role of the funders or sponsors in the review. | Page 18 |
| **Competing interests** | 26 | Declare any competing interests of review authors. | Page 18 |
| **Availability of data, code, and other materials** | 27 | Report which of the following are publicly available and where they can be found template data collection forms; data extracted from included studies; data used for all analyses; analytic code; any other materials used in the review. | Page 18 |

From: Page MJ, McKenzie JE, Bossuyt PM, Boutron I, Hoffmann TC, Mulrow CD, et al. The PRISMA 2020 statement: an updated guideline for reporting systematic reviews. MetaArXiv. 2020, September 14. DOI: 10.31222/osf.io/v7gm2. For more information, visit: www.prisma-statement.org

# **PRISMA Abstract Checklist**

| **Topic** | **No.** | **Item** | **Reported?** |
| --- | --- | --- | --- |
| **TITLE** |  |  |  |
| **Title** | 1 | Identify the report as a systematic review. | Yes |
| **BACKGROUND** |  |  |  |
| **Objectives** | 2 | Provide an explicit statement of the main objective(s) or question(s) the review addresses. | Yes |
| **METHODS** |  |  |  |
| **Eligibility criteria** | 3 | Specify the inclusion and exclusion criteria for the review. | Yes |
| **Information sources** | 4 | Specify the information sources (e.g. databases, registers) used to identify studies and the date when each was last searched. | Yes |
| **Risk of bias** | 5 | Specify the methods used to assess risk of bias in the studies included. | Yes |
| **Synthesis of results** | 6 | Specify the methods used to present and synthesize results. | Yes |
| **RESULTS** |  |  |  |
| **Included studies** | 7 | Give the total number of included studies and participants and summarise relevant characteristics of studies. | Yes |
| **Synthesis of results** | 8 | Present results for the main outcomes, preferably indicating the number of included studies and participants for each. If meta-analysis was done, report the summary estimate and confidence/credible interval. If comparing groups, indicate the direction of the effect (i.e. which group is favoured). | Yes |
| **DISCUSSION** |  |  |  |
| **Limitations of evidence** | 9 | Provide a brief summary of the limitations of the evidence included in the review (e.g. study risk of bias, inconsistency and imprecision). | Yes |
| **Interpretation** | 10 | Provide a general interpretation of the results and important implications. | Yes |
| **OTHER** |  |  |  |
| **Funding** | 11 | Specify the primary source of funding for the review. | No |
| **Registration** | 12 | Provide the register name and registration number. | Yes |

Page MJ, McKenzie JE, Bossuyt PM, Boutron I, Hoffmann TC, Mulrow CD, et al. The PRISMA 2020 statement: an updated guideline for reporting systematic reviews. MetaArXiv. 2020, September 14. DOI: 10.31222/osf.io/v7gm2. For more information, visit: [www.prisma-statement.org](http://www.prisma-statement.org/)

**Supplementary Material 2.** Full Search Strategy

| **Search strategy** | **Results** |
| --- | --- |
| **PubMed** |  |
| Search: Medical Curricula Filters: from 2010 - 2025 | 518,480 |
| Search: Medical Curricula AND Research Integration Filters: from 2010 - 2025 | 35,480 |
| Search: Medical Curricula AND Research Integration AND Outcome Filters: from 2010 - 2025 | 8,897 |
| Search: Medical Curricula AND Research Integration AND Global Trends Filters: from 2010 - 2025 | 4,505 |
| Search: Medical Curricula AND Research Integration AND Outcome AND Global Filters: from 2010 - 2025 | 1,281 |
| ERIC |  |
| Medical Curricula | 814 |
| Medical Curricula AND Research Integration | 12,713 |
| Medical Curricula AND Research Integration AND Outcome | 159 |
| Medical Curricula AND Research Integration AND Global Trends | 77 |
| **Scopus** |  |
| Search document: medical AND curricula Filters: from 2010 - 2025 | 53,017 |
| Search document: Research Integration AND research AND integration Filters: from 2010 - 2025 | 975 |
| Search document: Filters: Research Integration AND research AND integration AND outcome Filters: from 2010 - 2025 | 213 |
| Search document: Filters: Research Integration AND research AND integration AND outcome AND Global Trends Filters: from 2010 - 2025 | 7 |
| **Google Scholar** |  |
| “Medical Curricula” | 33,200 |
| “Medical Curricula” AND “Research Integration” | 70 |
| “Medical Curricula” AND “Research Integration” AND “Outcome” | 47 |
| “Medical Curricula” AND “Research Integration” AND “Global Trends” | 4 |

**Supplementary Material 3.** Risk of Bias Score for Quantitative Impacts Studies

| **Study Type** | **Assessment Tool** | **Components Evaluated** |
| --- | --- | --- |
| Observational and Cross-sectional Studies | Modified Newcastle-Ottawa Scale (NOS) | Selection (0-4★), Comparability (0-2★), Outcome/Measurement (0-3★) |
| Qualitative Studies | Critical Appraisal Skills Programme (CASP) | Clarity of aims, Appropriate methodology, Research design, Recruitment strategy, Data collection, Researcher-participant relationship, Ethical issues, Data analysis, Findings, Research value |
| Mixed Methods Studies | Mixed Methods Appraisal Tool (MMAT) | Screening questions, Qualitative component questions, Quantitative component questions, Mixed methods integration questions |
| Longitudinal Studies | Modified Newcastle-Ottawa Scale with Longitudinal Components | Selection, Follow-up, Completeness of follow-up, Adjustment for confounders, Outcomes |

| **Risk Level** | **NOS Score** | **CASP/MMAT Score** | **Description** |
| --- | --- | --- | --- |
| Low | 7-9★ | 8-10 points | Research has strong methodology, appropriate control of confounding factors, and complete reporting |
| Moderate | 4-6★ | 5-7 points | Research has some methodological strengths but also limitations that may affect the validity of results |
| High | 0-3★ | 0-4 points | Research has significant methodological limitations that may substantially impact the validity of results |

| **Study** | **Study Type** | **Assessment Tool** | **Selection** | **Measurement/Data Collection** | **Confounding/Comparability** | **Reporting** | **Overall Risk Level** |
| --- | --- | --- | --- | --- | --- | --- | --- |
| De Silva | Observational | Modified NOS | ★★★☆ | ★★☆ | ★☆ | ★★☆ | Moderate (6/9★) |
| MacDougal | Survey/Qualitative | CASP + Modified NOS | ★★☆ | ★★★ | ★☆ | ★★☆ | Moderate (5/10) |
| Burge | Program evaluation (Mixed) | MMAT | ★★☆ | ★★☆ | ★☆☆ | ★★★ | Moderate (6/10) |
| Vegt | Survey/Qualitative | CASP + Modified NOS | ★★★★ | ★★★ | ★★ | ★★★ | Low (8/10) |
| Ommering 1 | Survey (Quantitative) | Modified NOS | ★★★★ | ★★★ | ★★ | ★★★ | Low (8/9★) |
| Waaijer | Longitudinal | Modified NOS with Longitudinal | ★★★★ | ★★★ | ★★ | ★★★ | Low (9/9★) |
| Ommering 2 | Cross-sectional | Modified NOS | ★★★★ | ★★★ | ★★ | ★★★ | Low (8/9★) |
| Paudel | Cross-sectional survey | Modified NOS | ★★★☆ | ★★☆ | ★☆ | ★★☆ | Moderate (5/9★) |
| Ahmed | Qualitative thematic analysis | CASP | ★★☆ | ★★★ | N/A | ★★☆ | Moderate (7/10) |

**Supplementary Material 4 Table of studies characteristics**

**Table S1** Studies characteristics

| **Author** | **Year** | **Country** | **Study Objective** | **Study Design** | **Population** | **Sample Size** | **Research Focus** | **Outcome Measures** | **Research Methodology** | **Key Findings** |
| --- | --- | --- | --- | --- | --- | --- | --- | --- | --- | --- |
| De Silva | 2013 | Singapore | Duke-NUS medical student research experience | Observational | Medical students | 109 | Student experiences in research programs | Student involvement in research activities | Qualitative | Emphasized the importance of student involvement in research |
| MacDougal | 2010 | UK | Initiating students into research practice | Survey/Qualitative | Medical students | 203 | Supervisors' recommendations on student research | Supervisor recommendations | Qualitative | Found that supervision, mentorship, and training play key roles |
| Burge | 2014 | USA | Medical student summer research in family medicine | Program evaluation | Medical students | 40 | Family medicine research program | Program success | Qualitative/Quantitative | Positive student feedback, increased interest in family medicine |
| Vegt | 2021 | Netherlands | Research integration in biomedical curricula | Survey/Qualitative | Biomedical students | 87 | Student perspectives on research in curriculum | Perceptions of curriculum integration | Qualitative | Highlighted challenges of research integration |
| Ommering | 2021 | Netherlands | Motivation in selecting students for research programs | Survey | Medical students | 59 | Research program selection criteria | Motivation for research programs | Quantitative | Motivation is key in program selection |
| Waaijer | 2019 | Netherlands | Relationship between academic publishing and future careers | Longitudinal | Medical students | 4,145 | Publishing and career development | Research publication rates | Longitudinal | Early publishing leads to stronger research careers |
| Ommering | 2021 | Netherlands | Promoting research motivation in medical students | Cross-sectional | Medical students | 243 | Research motivation and self-efficacy | Motivation and self-efficacy | Quantitative | Research motivation enhances self-efficacy beliefs |
| Paudel | 2019 | Nepal | Knowledge, attitudes, and barriers to research in Nepal | Cross-sectional | Medical students | 253 | Research barriers and attitudes | Barriers to research | Quantitative | Identified common barriers and solutions to research |
| Ahmed | 2023 | Pakistan | Barriers and solutions to undergraduate research in Pakistan | Thematic analysis | Medical students | 33 | Barriers to research | Barriers and solutions | Qualitative | Identified key barriers to research in Pakistan and solutions |
